# Supplementary material for: Excitonic circular dichroism in boron–nitrogen cluster decorated graphene
Source: Royal Society of Chemistry journal article supplement (doi:10.1039/d4na00759j), 2025-01-01
Supplement: d4na00759j1.pdf [file d4na00759j1.pdf]

# Supporting Information (SI) for Excitonic circular dichroism in boron-nitrogen clusters decorated graphene

Shneha Biswas, Souren Adhikary<sup>#</sup>, Sudipta Dutta

*Department of Physics, Indian Institute of Science Education and Research (IISER) Tirupati, Andhra Pradesh, 517619, India*

*<sup>#</sup>Present Address: Department of Nanotechnology for Sustainable Energy, School of Science and Technology, Kwansei Gakuin University, 1-Gakuen Uegahara, Sanda 669-1330, Hyogo, Japan*

*Email: sdutta@iisertirupati.ac.in*

## A. Cohesive Energy Calculation

Employing the cohesive energy calculation, we verify the stability and potential experimental realization of the BNcG system, using the following expression:

$$E_{cohesive} = E_{BNcG} - 24 E_C - 3 E_N - 3 E_B - E_{hBN}$$

here  $E_{BNcG}$ ,  $E_{hBN}$ ,  $E_C$ ,  $E_N$ , and  $E_B$  are the total energies of the BNcG system, hBN system, and the energies of carbon (C), nitrogen (N), and boron (B) atoms in their  $sp^2$  hybridized planar structures, respectively. The term  $E_C$  is calculated by considering half of the energy of a two-atom graphene unit cell ( $E_{CC}$ ).  $E_{hBN}$  denotes the ground state energy of the two-atom unit cell consisting of one B and one N atom. The BNcG unit cell consists of 3 nitrogen and 3 boron atoms, which are connected to the carbon atoms. To replicate these  $sp^2$  hybridized environments,  $E_N$  and  $E_B$  are calculated from the two-dimensional monolayer honeycomb lattices,  $C_3N$  and  $BC_3$ , respectively from their 8-atom unit cells as per the following expressions:

$$E_B = (E_{BC_3} - 3E_{CC})/2$$

$$E_N = (E_{C_3N} - 3E_{CC})/2$$

As per our calculations,

$$E_{BNcG} = -285.235 \text{ eV}$$

$$E_{CC} = -18.4711 \text{ eV}$$

$$E_{hBN} = -17.5967 \text{ eV}$$

$$E_{BC3} = -67.227 \text{ eV}$$

$$E_{C3N} = -70.33 \text{ eV}$$

From the above expressions, we derive the following energies for single atoms,

$$E_C = -9.235 \text{ eV}$$

$$E_N = -7.458 \text{ eV}$$

$$E_B = -5.907 \text{ eV}$$

Incorporating all the above energy values, we finally obtain the cohesive energy,  $E_{cohesive} = -5.9 \text{ eV}$  for the total BNcG unit cell consisting of a total of 50 atoms. Therefore, the cohesive energy per atom comes out to be -184.4 meV. This negative cohesive energy indicates the stability of the BNcG system.

## B. Convergence test of GW calculations

We first consider the total number of bands including the valance and conduction band to calculate the dielectric matrix with a  $\mathbf{k}$ -point mesh of  $10 \times 10 \times 1$ , dielectric matrix cut-off of 10 Ry, and bare Coulomb cut-off 60 Ry as shown in Table S1. Then fixing the number of bands at 702 and by varying the dielectric matrix cut-off we achieve the convergence in the dielectric matrix with a  $10 \times 10 \times 1$  as shown in Table S1. Following this, with the fixed dielectric cut-off at 10 Ry, 702 bands, and  $10 \times 10 \times 1$   $\mathbf{k}$ -point we test the convergence on the bare Coulomb cut-off as shown in Table S2. We find 100 Ry the converged bare Coulomb cut-off. Finally, we assess the convergence for the coarse  $\mathbf{k}$ -grid and find that  $10 \times 10 \times 1$  as a converged  $\mathbf{k}$ -grid as shown in Table S1.

**Table S1:**  $N_b$  is the number of bands (occupied plus unoccupied),  $E_g$  in (eV) is the  $GW$  gap,  $E_{cut}$  (in Ry) is the energy cut-off of the plane wave,  $E_{\text{Epsilon-cut}}$  (in Ry) is the dielectric matrix cut-off in the epsilon calculations.

| $N_b$ | $E_g$ | Epsilon-cut | $E_g$ | $E_{cut}$ | $E_g$ | $\mathbf{k}$ -point     | $E_g$ |
|-------|-------|-------------|-------|-----------|-------|-------------------------|-------|
| 502   | 2.30  | 8           | 2.29  | 40        | 2.29  | $8 \times 8 \times 1$   | 2.28  |
| 602   | 2.29  | 9           | 2.29  | 50        | 2.29  | $9 \times 9 \times 1$   | 2.31  |
| 702   | 2.29  | 10          | 2.29  | 60        | 2.29  | $10 \times 10 \times 1$ | 2.29  |

### C. Convergence test of BSE calculations

To achieve the convergence of Bethe-Salpeter equation (BSE), we vary the number of valance and conduction bands. We find 3 valence bands and 4 conduction bands are the converged parameters in the BSE calculation. Then we test convergence by varying the  $\mathbf{k}$ -grid in BSE calculations. We find  $24 \times 24 \times 1$  is the converged  $\mathbf{k}$ -grid. The absorption plot of the singlet exciton of the BNcG system is shown in [FIG. S1](#).

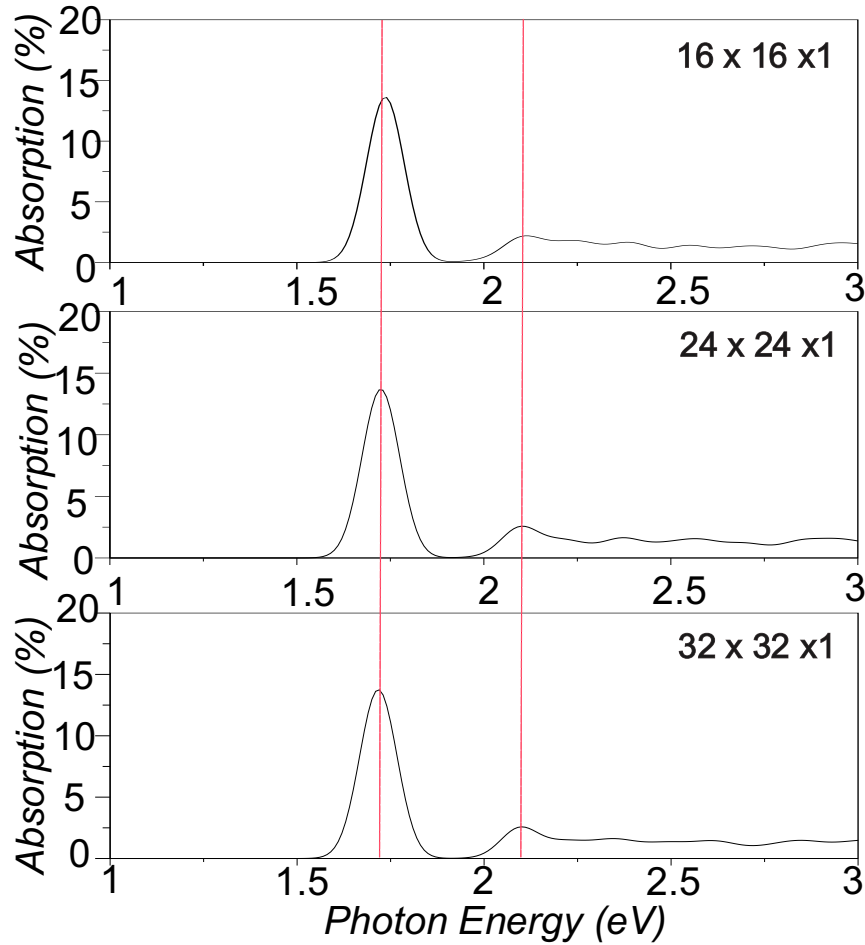

**FIG. S1:** BSE convergence test with 3 valence bands and 4 conduction bands. The top, middle, and bottom panels represent the absorption spectra of BNcG obtained from  $\mathbf{k}$ -grids of  $16 \times 16 \times 1$ ,  $24 \times 24 \times 1$  and  $32 \times 32 \times 1$ , respectively.

#### D. Original plots of Fig. 4 in the main text

The original plots of Fig.4 in the main text are provided here. Using a Python code given in the GitHub repository (bgwtools) of the BerkeleyGW package we obtain these plots. For improved visualization, we rotated all figures by a 45° angle, ensuring that the first Brillouin zone appears as a perfect hexagon, as depicted in Fig. 4 of the main text.

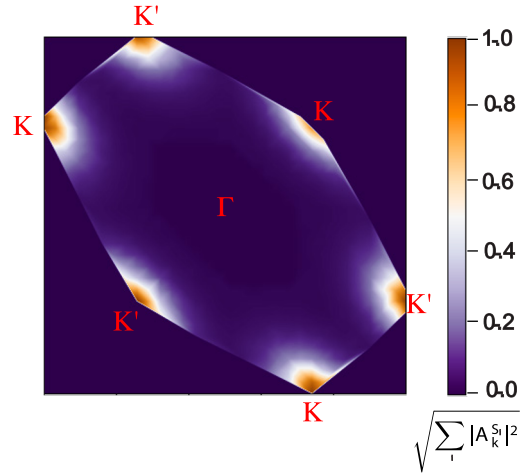

FIG. S2: The square root of the sum of the squared excitonic envelope function of the first bright singlet exciton of BNcG over the hexagonal first BZ.

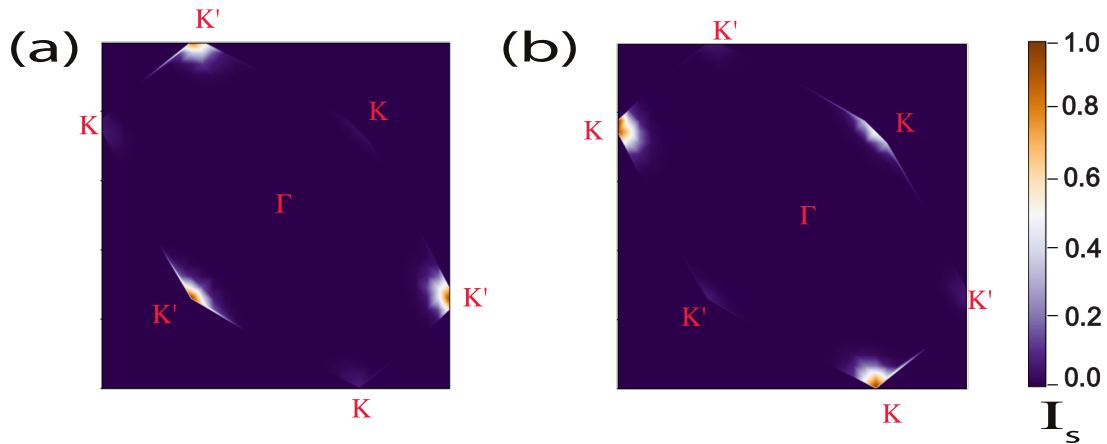

FIG. S3: The oscillator strengths of the first bright singlet ( $A$ ) exciton in the presence of (a) left and (b) right-handed circular polarized lights.
